# Supplementary material for: Study of the Counter Anions in the Host-Guest Chemistry of Cucurbit[8]uril and 1-Ethyl-1′-benzyl-4,4′-bipyridinium
Source: ScientificWorldJournal. 2013 May 27;2013:452056. doi: 10.1155/2013/452056 (PMC3678417; doi:10.1155/2013/452056)
Supplement: Supplementary file 1 — NMR spectra of BEV-Cl2, BEV-Br2 and BEV-I2, ES-MS spectra, optimized geometries, electrochemistry and photophysical spectra of the inclusion complexes. [file 452056.f1.doc]

Supporting information


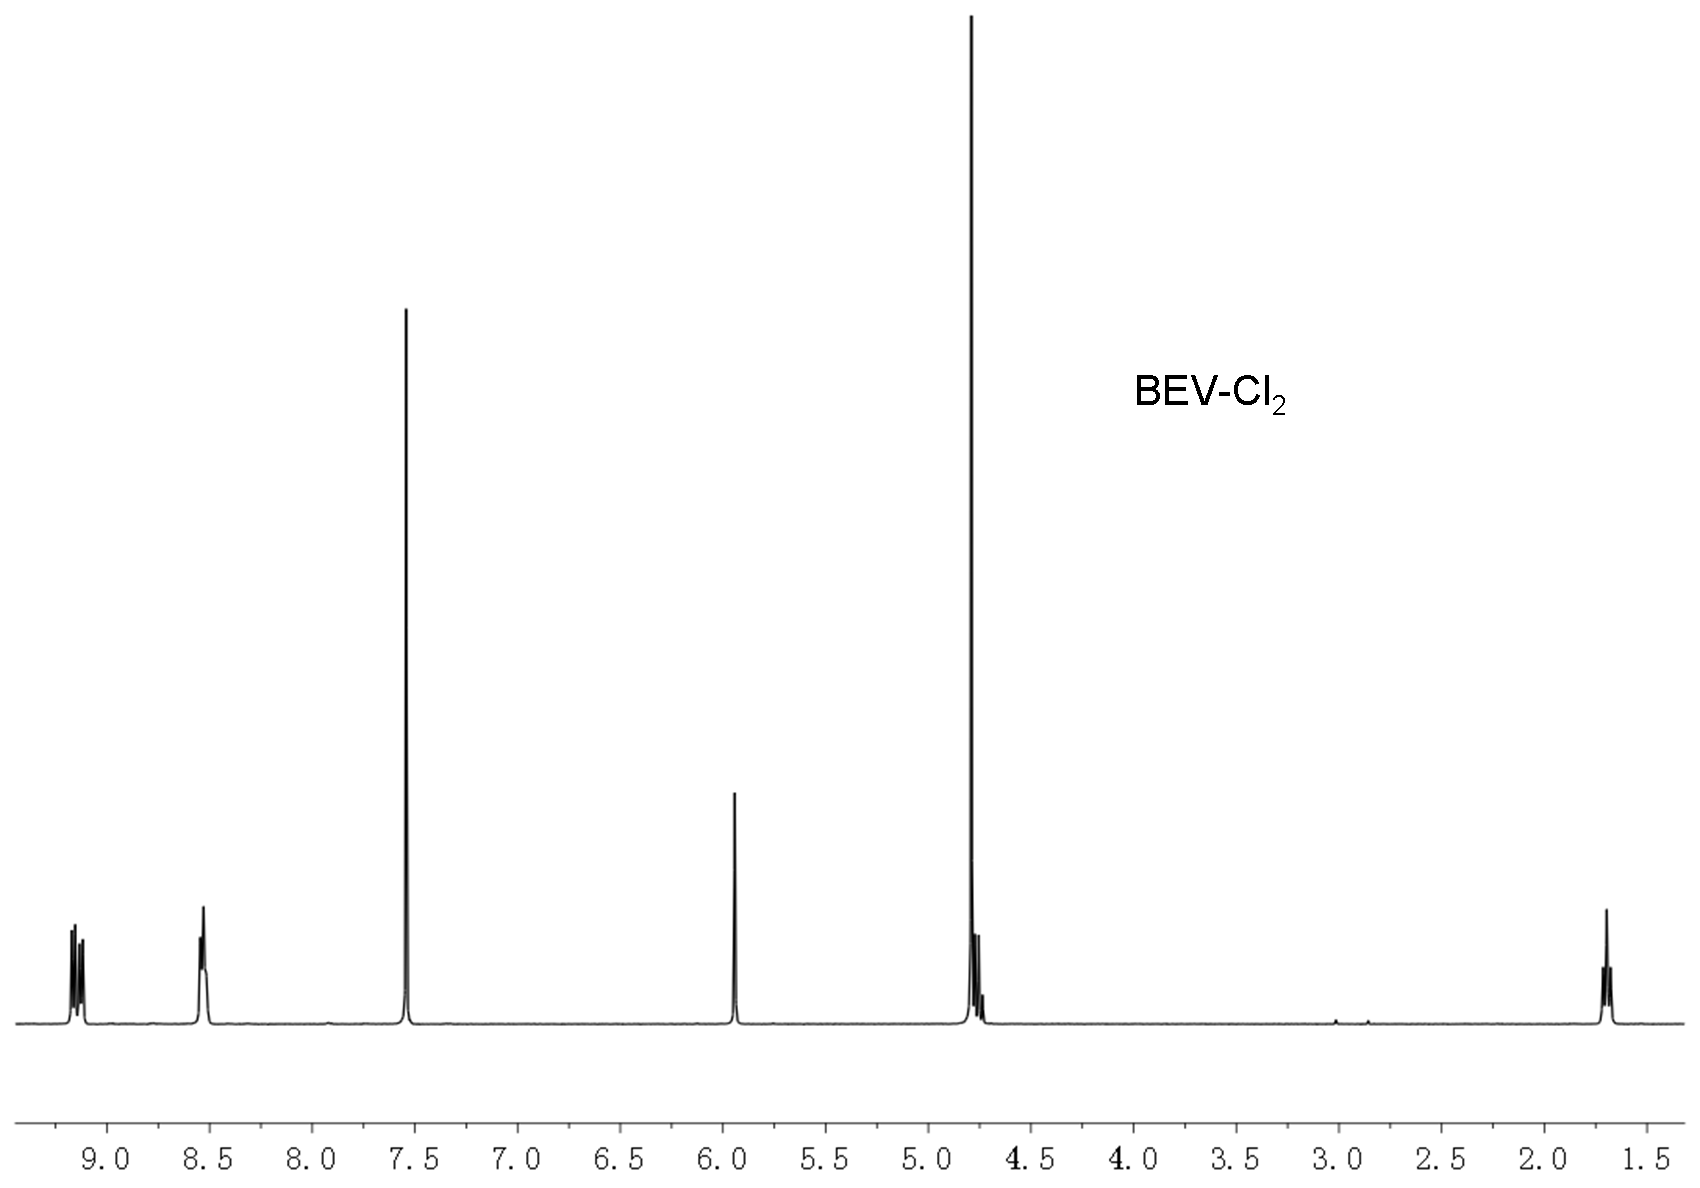


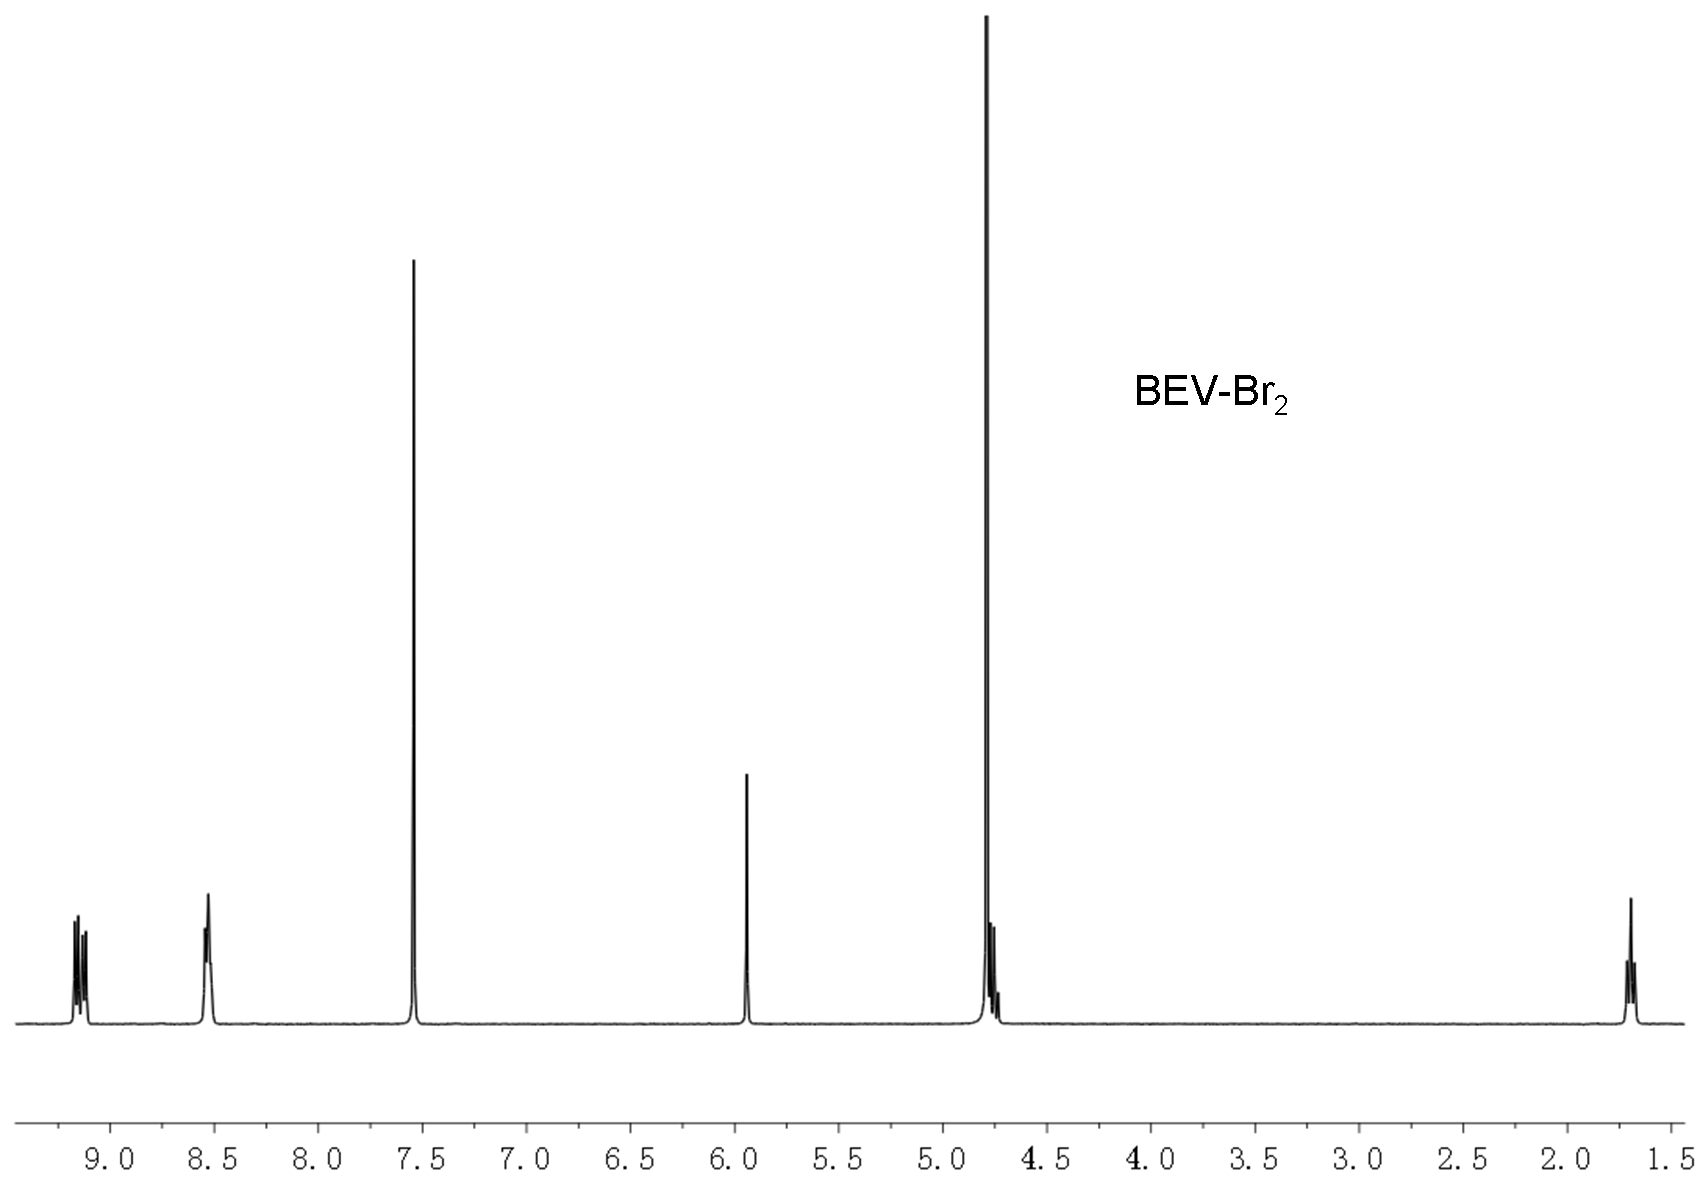


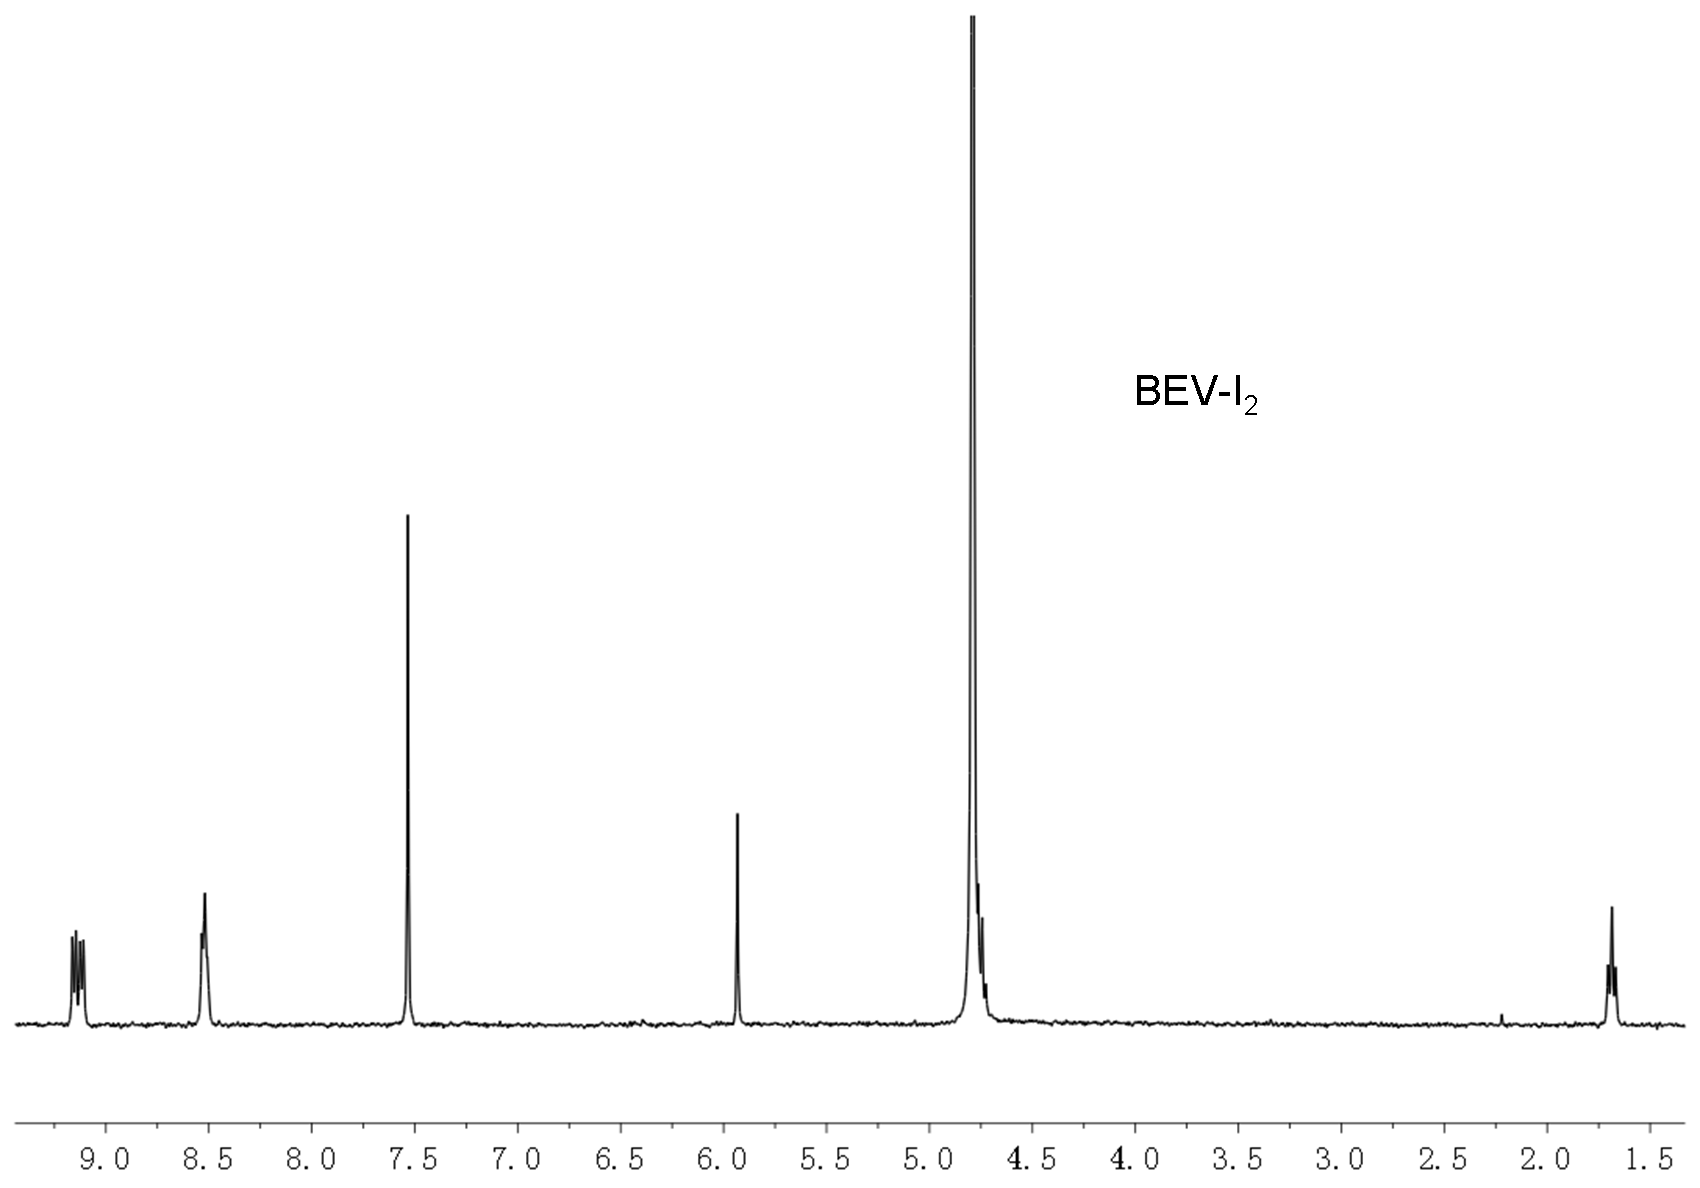


Fig. S1 1H NMR spectra of BEV-Cl2, BEV-Br2 and BEV-I2 in D2O (400 MHz)

Fig. S2 ES-MS spectra of the 1:1 host-guest complexes BEV2+/CB[8], from up to down, the counter anion is Cl, Br, I, respectively.


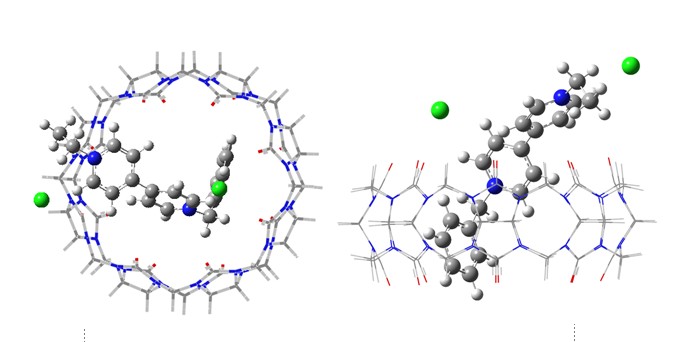

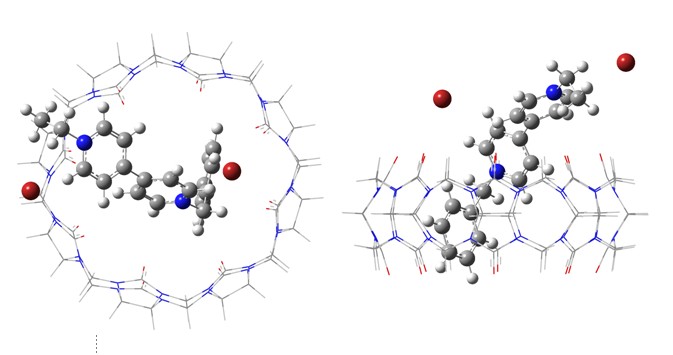

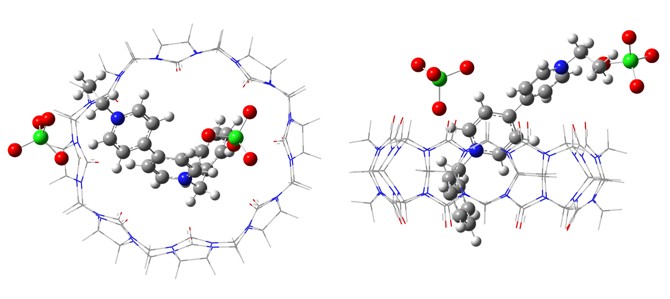

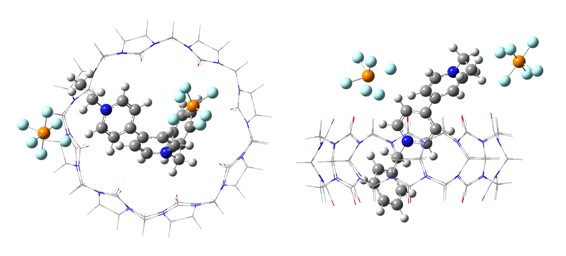


Fig. S3 The optimized geometries of the inclusion complexes BEV-X2/CB[8] viewed from front (left) and side (right). To aid visualization, CB[8] is in stick representation and the viologen salt in ball and stick representation with the X atoms in colour. From up to down, BEV-Cl2, BEV-Br2, BEV-(ClO4)2, and BEV-(PF6)2 respectively.

Fig. S4CV (left) and DPV (right) curves for the 1:1 host-guest complexes BEV2+/CB[8] in 0.1 M PBS, from up to down, the counter anion is Cl, Br, I, PF6 and ClO4 respectively. The concentration of BEV-X2 was 0.5 mM.

Fig. S5CV (left) and DPV (right) curves for 0.1 M PBS buffer alone.

Fig. S6Control experiment on the UV-Vis titration of 1x10-5 M KI with 1.5 eq CB[8].

Fig. S7Absorption responses of 10 μM BEV-X2 to CB[8] solutions for Kd value determination. From (A) to (E), the counter ion is Cl, Br, I, PF6 and ClO4, respectively. The concentration of BEV-X2 was 1x10-5 M.

Fig. S8Control experiment on the UV-Vis of Na2S2O4 (8-10 eq) in aqueous solution
